# Supplementary material for: A single layer of Fe3O4@TiO2 submicron spheres as a high-performance electrode for lithium-ion microbatteries
Source: Royal Society of Chemistry journal article supplement (doi:10.1039/c9se00259f), 2019-01-01
Supplement: c9se00259f1.pdf [file c9se00259f1.pdf]

**A Single Layer of Fe<sub>3</sub>O<sub>4</sub>@TiO<sub>2</sub> Submicron Spheres as High-Performance Electrode for  
Lithium-Ion Microbattery**

*Jung-Min Kim, Jun-Ki Hwang, Yang-Kook Sun\*, and Jusef Hassoun\**

J. M. Kim, J. K. Hwang

Department of Chemical Engineering, College of Engineering, Hanyang University, Seoul 133-791,  
Republic of Korea

Prof. Y. K. Sun

Department of Energy Engineering, College of Engineering, Hanyang University, Seoul 133-791,  
Republic of Korea

E-mail: [yksun@hanyang.ac.kr](mailto:yksun@hanyang.ac.kr)

Prof. J. Hassoun

Department of Chemical and Pharmaceutical Sciences, University of Ferrara, Via Fossato di  
Mortara, 17, 44121, Ferrara, Italy

E-mail: [jusef.hassoun@unife.it](mailto:jusef.hassoun@unife.it)

**Keywords**

Single-layer electrode; core-shell Fe<sub>3</sub>O<sub>4</sub>@TiO<sub>2</sub> spheres; microbattery; lithium ion; high  
performance

Supplementary Information

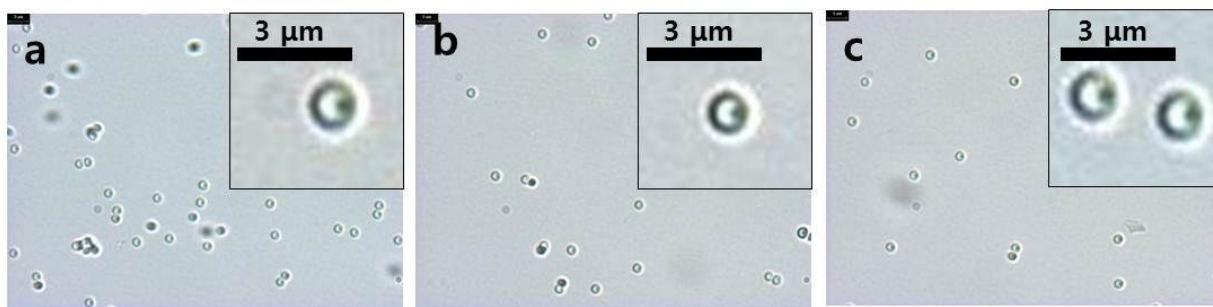

**Figure S1.** OM images of (a) crosslinked poly(MAA/EGDMA) microspheres in aqueous solution (b) after introducing iron oxide precursors and (c) after subsequent addition of  $\text{NH}_4\text{OH}$ .

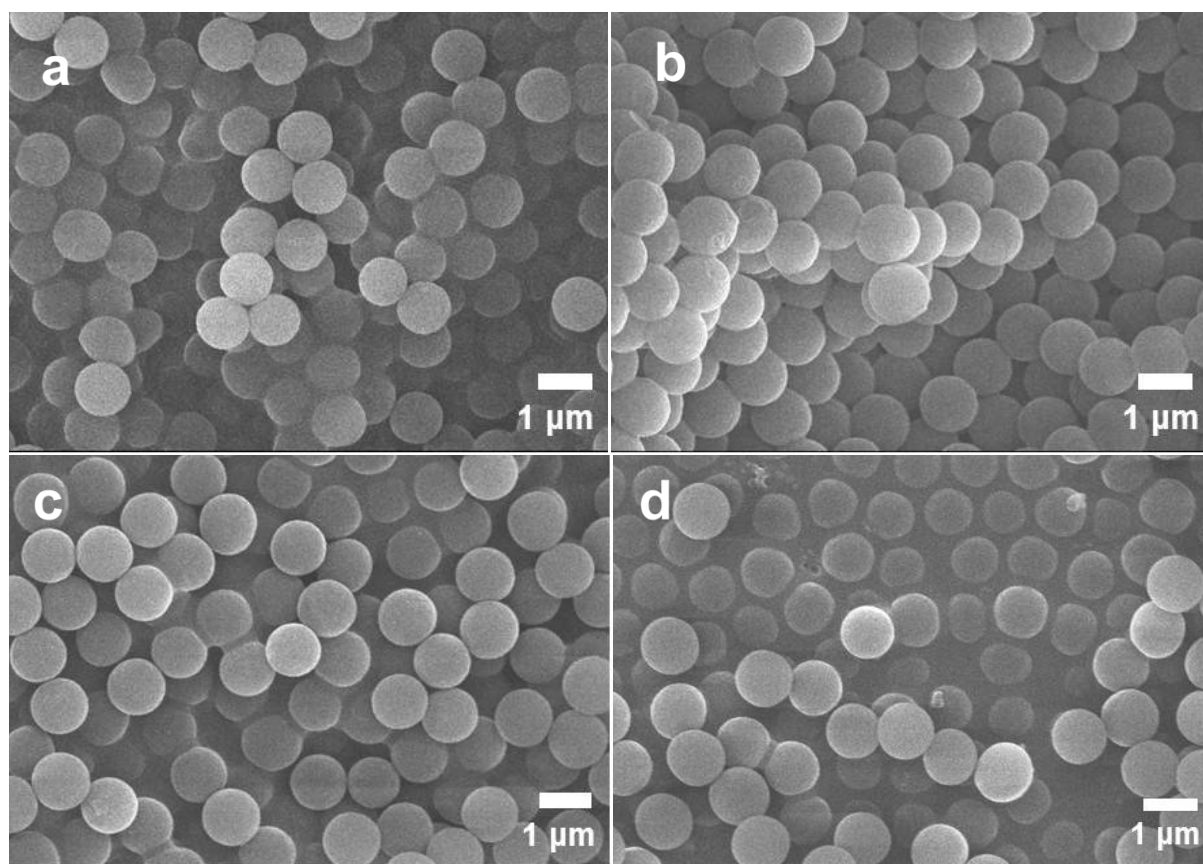

**Figure S2.** SEM images of (a) crosslinked poly(MAA/EGDMA) microspheres, (b) sample after introducing iron oxide precursors and (c) sample after subsequent addition of  $\text{NH}_4\text{OH}$ , and (d) after  $\text{TiO}_2$  shell formation by sol-gel reaction.

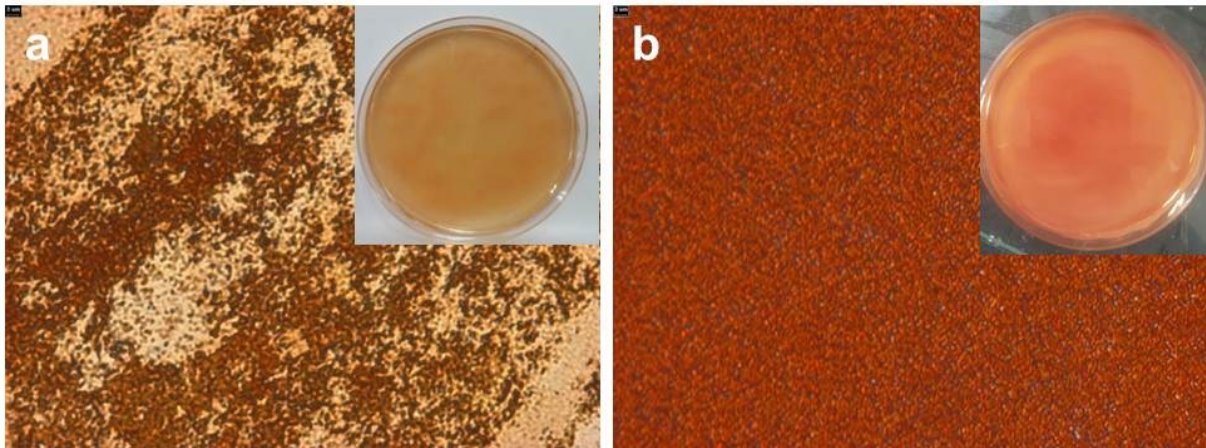

**Figure S3.** OM and digital (insets) photographic images of single-particle layer assembled with (a)  $\alpha\text{-Fe}_2\text{O}_3$  and (b)  $\alpha\text{-Fe}_2\text{O}_3@\text{TiO}_2$  (sol-gel reaction time: 24 h) core-shell submicron spheres on PDMS film substrate.

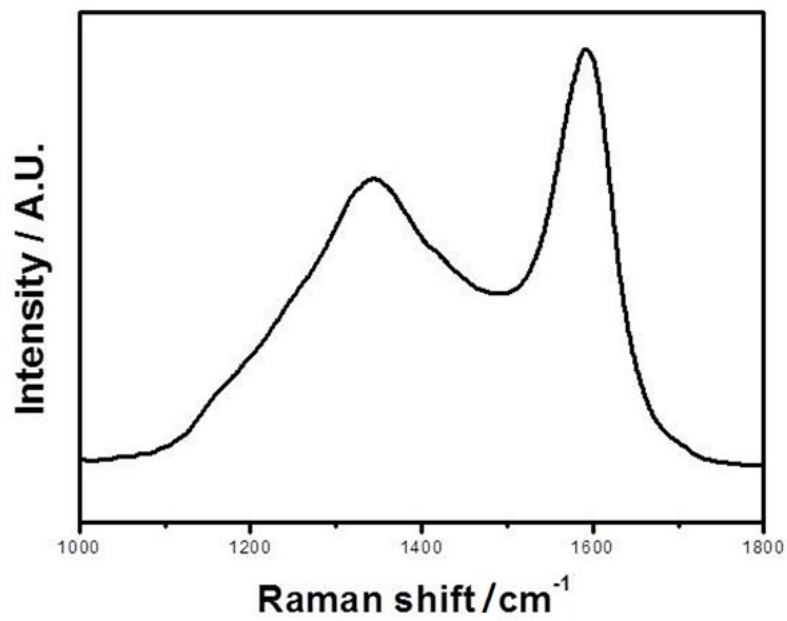

**Figure S4.** Raman spectrum of  $\text{Fe}_3\text{O}_4@\text{TiO}_2$  core-shell submicron spheres upon heat treatment at 600 °C in argon atmosphere.

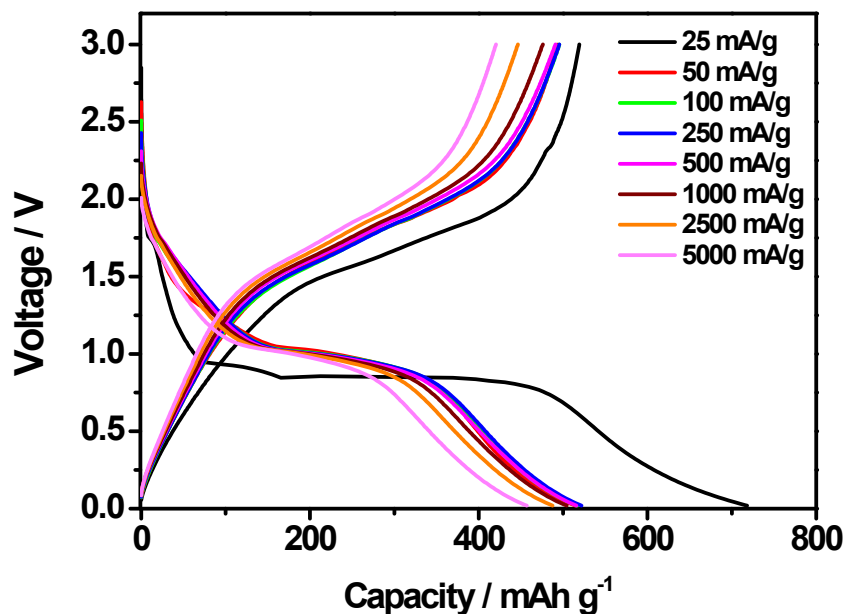

**Figure S5.** Voltage profiles of single-layer electrode with  $\text{Fe}_3\text{O}_4@\text{TiO}_2$  core-shell submicron spheres galvanostatically cycled in lithium cell in voltage window between 0.02 and 3 V at current rates ranging from 25 to 5000  $\text{mA g}^{-1}$ . Electrolyte: EC/DEC (1:1 v/v),  $\text{LiPF}_6$  1 M.

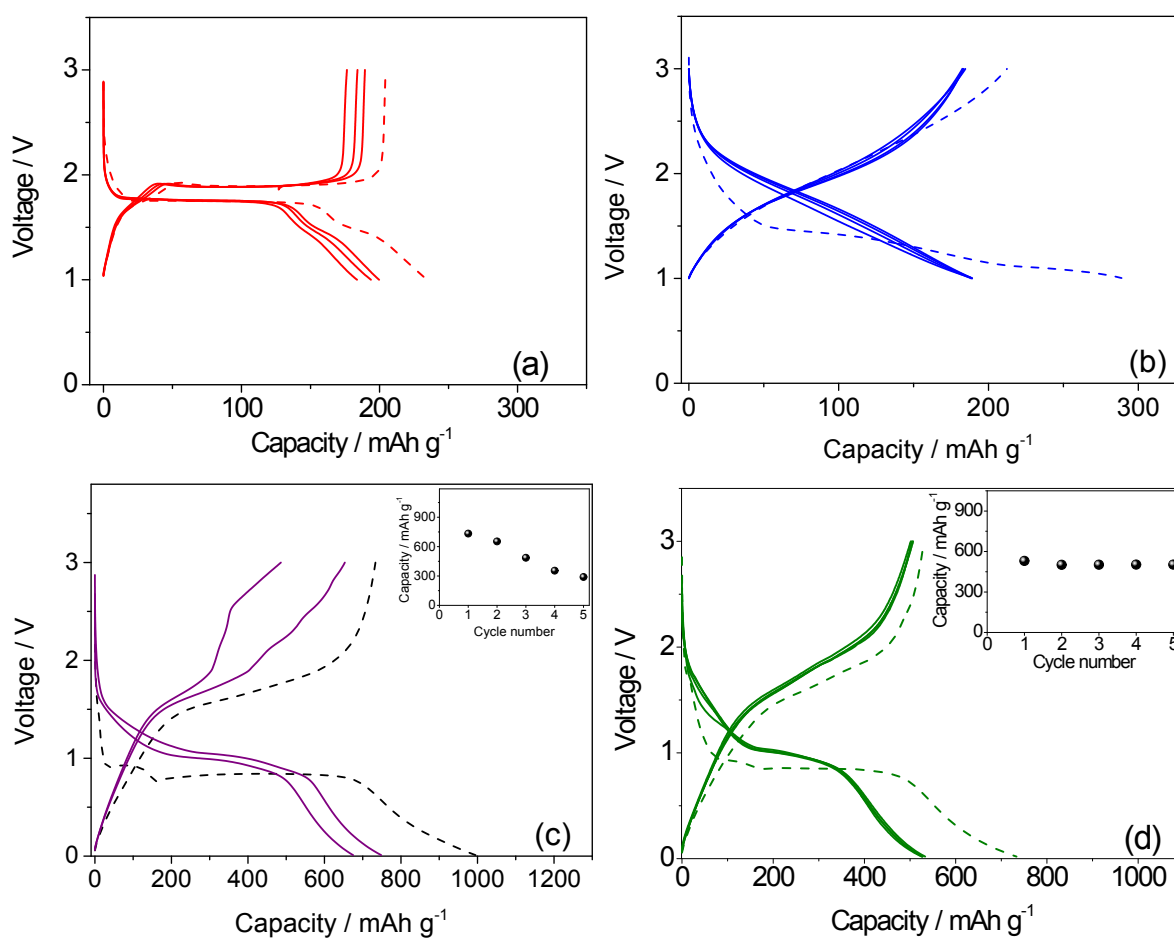

**Figure S6.** Galvanostatic tests in lithium half-cells using bare TiO<sub>2</sub> anatase (a), rutile (b), and Fe<sub>3</sub>O<sub>4</sub> (c) samples with sub-micrometric or nanometric size, in comparison with the Fe<sub>3</sub>O<sub>4</sub>@TiO<sub>2</sub> submicron spheres studied in the work (d). The cells were cycled at C/5 rate (1C value was 170 and 335 and mA g<sup>-1</sup> anatase and rutile TiO<sub>2</sub>, respectively, and 1007 mA g<sup>-1</sup> for Fe<sub>3</sub>O<sub>4</sub>). Voltage limits 0 – 3 V (Fe<sub>3</sub>O<sub>4</sub> samples), 1 – 3 V (TiO<sub>2</sub> samples).

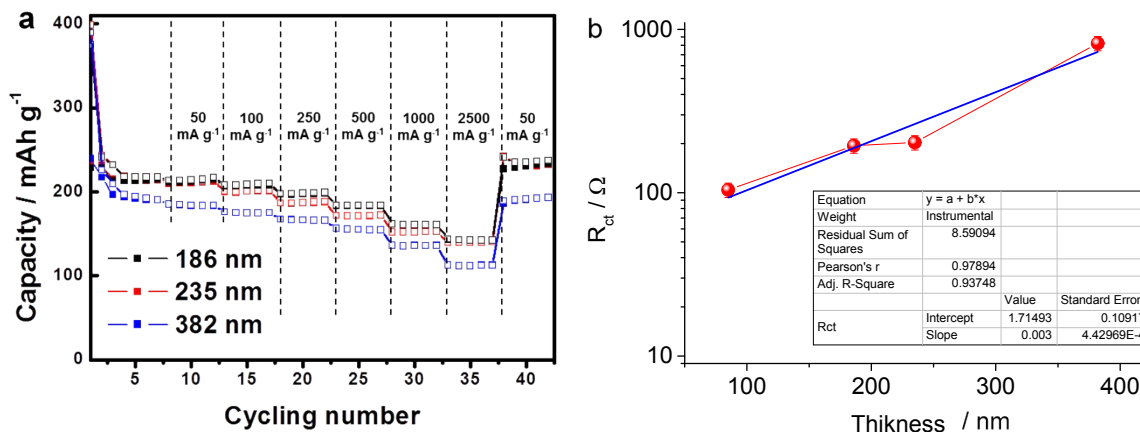

**Figure S7.** (a) Cycling trend at various currents of single-layer electrodes with increasing average thicknesses of carbon interlayers between Fe<sub>3</sub>O<sub>4</sub>@TiO<sub>2</sub> core-shell submicron spheres and Cu current collector reported in manuscript, that is, 186 nm (Fig. 5d), 235 nm (Fig. 5e), and 382 nm (Fig. 5f). Cell galvanostatically cycled in voltage window between 0.02 and 3 V at current rates ranging from 50 to 5000 mA g<sup>-1</sup>. (b) Trend of interphase resistances obtained by NLLSQ fits of Nyquist plots of above single-layer electrodes in lithium cells (see Table S1). Electrolyte: EC/DEC (1:1 v/v), LiPF<sub>6</sub> 1M. Frequency range 100 kHz –5 mHz, signal amplitude of 50 mV.

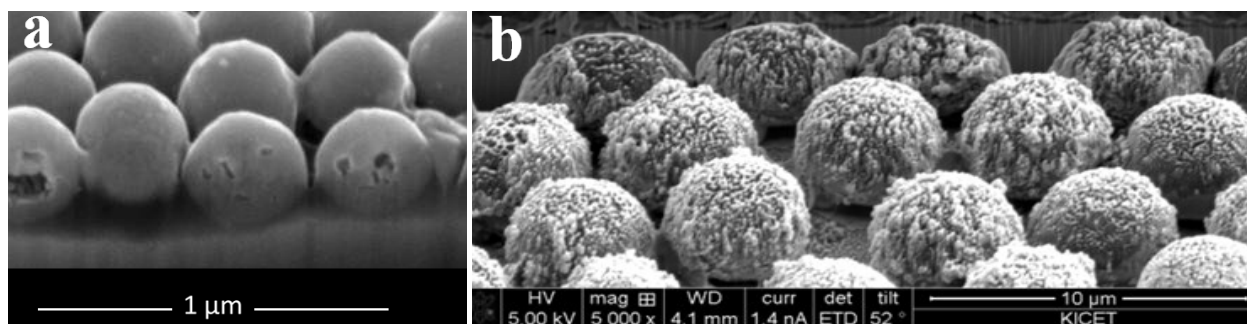

**Figure S8.** An example in which the iron oxide microelectrode has been upgraded by raising the size of the active material spheres from about 0.4 μm (a) to about 4 μm (b) for increasing of the electrode thickness.

| Carbon interlayer Thickness (nm) | R ( $\Omega$ ) |
|----------------------------------|----------------|
| 85                               | 104            |
| 186                              | 194            |
| 235                              | 203            |
| 382                              | 822            |

**Table S1.** Electrode/electrolyte interphase resistances obtained by NLLSQ fits of Nyquist plots of single-layer electrodes with increasing average thicknesses of carbon interlayers between  $\text{Fe}_3\text{O}_4@\text{TiO}_2$  core-shell submicron spheres and Cu current collector reported in manuscript, that is, 85 nm (Fig. 4d), 186 nm (Fig. 5d), 235 nm (Fig. 5e), and 382 nm (Fig. 5f). Electrolyte: EC/DEC (1:1 v/v),  $\text{LiPF}_6$  1M. Frequency range 100 kHz – 5 mHz, signal amplitude of 50 mV.
